# Supplementary material for: Computational Approaches for the Designing of Novel Anticancer Compounds Based on Pyrazolo[3,4-d]pyrimidine Derivatives as TRAP1 Inhibitor
Source: Research Square preprint supplement (doi:10.21203/rs.3.rs-94143/v1), 2020-10-26
Supplement: Supplementary file 1 [file 56bfa40221b0d27a50f7d53e.csv]

Molecule	Canonical SMILES	Formula	MW	#Heavy atoms	#Aromatic heavy atoms	Fraction Csp3	#Rotatable bonds	#H-bond acceptors	#H-bond donors	MR	TPSA	iLOGP	XLOGP3	WLOGP	MLOGP	Silicos-IT Log P	Consensus Log P	ESOL Log S	ESOL Solubility (mg/ml)	ESOL Solubility (mol/l)	ESOL Class	Ali Log S	Ali Solubility (mg/ml)	Ali Solubility (mol/l)	Ali Class	Silicos-IT LogSw	Silicos-IT Solubility (mg/ml)	Silicos-IT Solubility (mol/l)	Silicos-IT class	GI absorption	BBB permeant	Pgp substrate	CYP1A2 inhibitor	CYP2C19 inhibitor	CYP2C9 inhibitor	CYP2D6 inhibitor	CYP3A4 inhibitor	log Kp (cm/s)	Lipinski #violations	Ghose #violations	Veber #violations	Egan #violations	Muegge #violations	Bioavailability Score	PAINS #alerts	Brenk #alerts	Leadlikeness #violations	Synthetic Accessibility
42	Nc1nc(Cl)c2c(n1)n(nc2)Cc1cc2OCOc2cc1I	C13H9ClIN5O2	429.6	22	15	0.15	2	5	1	89.27	88.08	2.65	2.86	2.45	2.51	2.49	2.59	-4.68	9.02E-03	2.10E-05	Moderately soluble	-4.37	1.84E-02	4.28E-05	Moderately soluble	-5.12	3.27E-03	7.62E-06	Moderately soluble	High	No	No	Yes	No	Yes	No	No	-6.89	0	0	0	0	0	0.55	0	1	1	2.7
46	COc1ccc(c(c1F)Cn1ncc2c1nc(N)nc2Cl)F	C13H10ClF2N5O	325.7	22	15	0.15	3	6	1	76.89	78.85	2.45	2.57	3.25	2.65	2.52	2.69	-3.78	5.34E-02	1.64E-04	Soluble	-3.87	4.35E-02	1.34E-04	Soluble	-5.18	2.14E-03	6.58E-06	Moderately soluble	High	Yes	No	Yes	No	No	No	No	-6.46	0	0	0	0	0	0.55	0	0	0	2.39
49	Nc1nc(Cl)c2c(n1)n(nc2)Cc1c(F)ccc(c1F)F	C12H7ClF3N5	313.67	21	15	0.08	2	6	1	70.36	69.62	2.2	2.69	3.8	3.34	2.91	2.99	-3.88	4.17E-02	1.33E-04	Soluble	-3.8	4.92E-02	1.57E-04	Soluble	-5.34	1.43E-03	4.57E-06	Moderately soluble	High	Yes	No	Yes	Yes	No	No	No	-6.3	0	0	0	0	0	0.55	0	1	0	2.25
56	Nc1nc(C)c2c(n1)n(Cc1cc3OCOc3cc1Br)nc2C	C15H14BrN5O2	376.21	23	15	0.27	2	5	1	89.17	88.08	2.89	2.74	2.57	2.09	2.54	2.57	-4.25	2.12E-02	5.63E-05	Moderately soluble	-4.24	2.14E-02	5.70E-05	Moderately soluble	-5.22	2.24E-03	5.96E-06	Moderately soluble	High	No	Yes	Yes	No	Yes	No	Yes	-6.65	0	0	0	0	0	0.55	0	0	1	2.84
43	Nc1nc(Cl)c2c(n1)n(nc2)Cc1cc2OCOc2cc1C	C14H12ClN5O2	317.73	22	15	0.21	2	5	1	81.52	88.08	2.62	2.57	2.16	1.99	2.02	2.27	-3.8	5.02E-02	1.58E-04	Soluble	-4.07	2.72E-02	8.56E-05	Moderately soluble	-4.64	7.26E-03	2.29E-05	Moderately soluble	High	No	Yes	Yes	No	No	No	Yes	-6.41	0	0	0	0	0	0.55	0	0	0	2.6
ZINC05434822	C[C@H](C(=O)c1c[nH]c2c1cccc2)Sc1nnc(o1)c1ccccc1C	C20H17N3O2S	363.43	26	20	0.15	5	4	1	102.8	97.08	2.86	4.56	4.89	2.51	4.97	3.96	-5.21	2.27E-03	6.23E-06	Moderately soluble	-6.32	1.73E-04	4.77E-07	Poorly soluble	-7.62	8.72E-06	2.40E-08	Poorly soluble	High	No	No	Yes	Yes	Yes	Yes	Yes	-5.28	0	0	0	0	0	0.55	0	0	2	3.67
ZINC72286418	O=C([C@@H]1C[C@@H]1c1c(F)cccc1F)Nc1ccc(c(c1)C(=O)N)F	C17H13F3N2O2	334.29	24	12	0.18	5	5	2	80.71	72.19	1.9	2.12	4.01	3.39	3.6	3.01	-3.29	1.72E-01	5.15E-04	Soluble	-3.27	1.81E-01	5.41E-04	Soluble	-5.68	6.95E-04	2.08E-06	Moderately soluble	High	Yes	Yes	No	Yes	No	Yes	No	-6.83	0	0	0	0	0	0.55	0	0	0	2.92
ZINC05297837	Brc1cccc(c1)Cn1c(N/N=C\c2ccccc2O)nc2c1c(=O)[nH]c(=O)n2C	C20H17BrN6O3	469.29	30	21	0.1	5	5	3	118.83	117.3	2.31	3.27	2.19	2.47	2.79	2.61	-5	4.72E-03	1.01E-05	Moderately soluble	-5.41	1.84E-03	3.91E-06	Moderately soluble	-6.43	1.73E-04	3.68E-07	Poorly soluble	High	No	No	No	No	No	No	No	-6.84	0	0	0	0	0	0.55	1	1	1	3.37
Molecule 1	Brc1ccc(c(c1)F)Cn1ncc2c1nc(N)nc2Cl	C12H8BrClFN5	356.58	20	15	0.08	2	4	1	78.14	69.62	2.6	3.19	3.44	3.2	2.74	3.03	-4.48	1.17E-02	3.28E-05	Moderately soluble	-4.32	1.69E-02	4.75E-05	Moderately soluble	-5.61	8.81E-04	2.47E-06	Moderately soluble	High	Yes	No	Yes	Yes	No	No	No	-6.21	0	0	0	0	0	0.55	0	0	1	2.22
